# Supplementary material
Source: ML conference proceedings conference paper supplement (https://aclanthology.org/D19-1439)
Supplement: Attachment [file main_appendix_only.pdf › main_appendix_only.pdf]

## A Annotated WIKICREM Examples

The appendix contains the 100 manually annotated examples.

1. Throughout training camp , Jackson competed to be the Bengals ' third cornerback on the depth chart against Darqueze Dennard . On August 2 , 2016 , it was announced that [MASK] had suffered a torn pectoral muscle and would have to undergo surgery .

**ambiguous**

Pronoun in place of [MASK]?: **No**

Annotator's answer: **N/A**

Correct?: **N/A**

2. The Ark " consisted of a giant rowboat with a small engine which Beek used as his first ferry vessel . " The [MASK] " carried oars in the event of engine failure .

**not ambiguous**

Pronoun in place of [MASK]?: **no**

Annotator's answer: **Ark**

Correct?: **yes**

3. However , John was able to gain the lost estates by a marriage to Joanna of Urgell , granddaughter of Peter IV of Aragon . [MASK] fought with Aragon against Castile , but helped his brother Peter , Cardinal of Foix and Arles , to crush insurgents from Aragon .

**not ambiguous**

Pronoun in place of [MASK]?: **yes**

Annotator's answer: **John**

Correct?: **yes**

4. Ultravox had gone on to greater success with Midge Ure fronting the band , but when Simon left the band in 1988 , Billy Currie formed a new band which later included [MASK] .

**not ambiguous**

Pronoun in place of [MASK]?: **no**

Annotator's answer: **Midge Ure**

Correct?: **no**

5. The poem describes the poet 's idyllic family life with his own three daughters , Alice , Edith , and Anne Allegra : " grave [MASK] , and laughing Allegra , and Edith with golden hair . "

**not ambiguous**

Pronoun in place of [MASK]?: **no**

Annotator's answer: **Alice**

Correct?: **yes**

6. Koch and Eide searched Cho 's belongings and found a pocket knife , but they did not find any items that they deemed threatening . [MASK] also described a telephone call that he received from Cho during the Thanksgiving holiday break from school .

**ambiguous**

Pronoun in place of [MASK]?: **no**

Annotator's answer: **N/A**

Correct?: **N/A**

7. As Rajveer was able to successfully lead the escape of them both , Harleen now entrusts Rajveer , subsequently falling in love with him . When Rajveer goes out of his hotel with [MASK] , he sees that they are wanted by Interpol .

**not ambiguous**

Pronoun in place of [MASK]?: **yes**

Annotator's answer: **Harleen**

Correct?: **yes**

8. Elmas , Su Masu in Sardinian language , is a " comune " of the Metropolitan City of Cagliari in the Italian region of Sardinia , located about northwest of Cagliari . Until 1989 [MASK] was a district of Cagliari .

**not ambiguous**

Pronoun in place of [MASK]?: **yes**

Annotator's answer: **Elmas**

Correct?: **yes**

9. Later in the year , Li Keyong did send Li Sizhao and Zhou to capture Xi and Ci Prefectures , which had become under Zhu 's control when [MASK] conquered Huguo earlier in 901 .

**not ambiguous**

Pronoun in place of [MASK]?: **yes**

Annotator's answer: **Zhu**

Correct?: **yes**

10. Elisha told Hazael to tell Hadadezer that he would recover , and he revealed to Hazael that the king would recover but would die of other means . The day after he returned to Hadadezer in Damascus , [MASK] suffocated him and seized power himself .

**not ambiguous**

Pronoun in place of [MASK]?: **yes**

Annotator's answer: **Hazael**  
Correct?: **yes**

11. In 1946 , Hill and Knowlton dissolved their partnership , and Knowlton took over the direction of Hill & Knowlton Cleveland , which closed shortly after Knowlton's retirement in 1962 . [MASK] also maintained an interest in music .

**ambiguous**

Pronoun in place of [MASK]?: **no**

Annotator's answer: **N/A**

Correct?: **N/A**

12. First , God is revealed with Law , and secondly , God is revealed as Person . [MASK] 's anger at Moses for not speaking to the rock on the second occasion , highlights that this is not the spiritual picture He wanted portrayed .

**not ambiguous**

Pronoun in place of [MASK]?: **yes**

Annotator's answer: **God**

Correct?: **yes**

13. He now said he had seen Acreman follow Cheryl Fergeson up a staircase leading to the auditorium and then heard her scream , " No " and " Don 't . " Later that day , [MASK] warned Sessum not to tell anyone what he had seen .

**not ambiguous**

Pronoun in place of [MASK]?: **no**

Annotator's answer: **Acreman**

Correct?: **yes**

14. Meidi finally figures it out , but does not reveal to Qi Yue and Ah Meng until [MASK] confesses .

**ambiguous**

Pronoun in place of [MASK]?: **no**

Annotator's answer: **N/A**

Correct?: **N/A**

15. Brett went back to Leary , expecting to be turned down again , but this time , Leary gave Brett the aircraft he wanted . " Perhaps " , [MASK] speculated , " Leary had heard from Washington " .

**not ambiguous**

Pronoun in place of [MASK]?: **yes**

Annotator's answer: **Brett**

Correct?: **yes**

16. Maurice White spoke to Stepney on the morning of May 17 , 1976 , but later that day , Earth , Wind & Fire keyboardist Larry Dunn received a phone call , informing him that [MASK] had died of a heart attack .

**not ambiguous**

Pronoun in place of [MASK]?: **no**

Annotator's answer: **Stepney**

Correct?: **yes**

17. Li Yi sought aid from Gao , who personally led two thousand cavalry soldiers to aid Li Yi , causing Dou to withdraw . Gao thereafter sought to submit to Tang , through [MASK] .

**not ambiguous**

Pronoun in place of [MASK]?: **no**

Annotator's answer: **Li Yi**

Correct?: **yes**

18. At Cambridge , Rose studied under Hubert Middleton and Edward Joseph Dent from 1935 to 1939 . [MASK] started his academic career at The Queen 's College , Oxford .

**not ambiguous**

Pronoun in place of [MASK]?: **yes**

Annotator's answer: **Rose**

Correct?: **yes**

19. Brady and Bolger leave with Rothbaum , and Rothbaum demands the money Brady owes him . When Rothbaum threatens to kill them if they don 't pay up , Bolger shoots Rothbaum 's thugs , and Brady stabs [MASK] , killing him .

**not ambiguous**

Pronoun in place of [MASK]?: **no**

Annotator's answer: **Rothbaum**

Correct?: **yes**

20. In the reception room , a boy named Billy won 't stop staring at Don . [MASK] is drawing a picture and then rips it out of his book and hands it to Billy , getting up and leaving .

**not ambiguous**

Pronoun in place of [MASK]?: **yes**

Annotator's answer: **Don**

Correct?: **yes**

21. Hasan and Stein agree that Harsa became king in 1089 . Utkarsa was disliked and soon deposed , with a half - brother called Vijayamalla supporting [MASK] and being at the

forefront of the rebellion against the king .

**ambiguous**

Pronoun in place of [MASK]?: **no**

Annotator's answer: **N/A**

Correct?: **N/A**

22. Yet this did not prevent Leisegang from re-asserting that Aristotle 's own pattern of thinking was incompatible with a proper understanding of Plato . " Therein Cherniss believed Jaeger to be contrary to [MASK] , and Leisegang was unsympathetic to compatibility between Plato and Aristotle in both and above .

**not ambiguous**

Pronoun in place of [MASK]?: **no**

Annotator's answer: **Leisegang**

Correct?: **yes**

23. Aska later decides not to rule Cephire because Fuu told her that the Pillar can think only of Cephire , but since Lady Aska loves the people of Fahren , she cannot complete the task of Pillar in [MASK] .

**not ambiguous**

Pronoun in place of [MASK]?: **yes**

Annotator's answer: **Cephire**

Correct?: **yes**

24. As the weeks wore on , it became evident that Nick could be Lujack 's twin brother , hence , Alex 's son . [MASK] soon became obsessed with Nick and Mindy warned him that Alex wouldn 't give up until she got him .

**not ambiguous**

Pronoun in place of [MASK]?: **yes**

Annotator's answer: **Alex**

Correct?: **yes**

25. Due to Jijii 's psychological manipulation , Ichi believes that Kaneko is his brother and confronts him . Kaneko shoots the side of [MASK] 's leg , causing Ichi to slit Kaneko 's throat in front of Takeshi .

**not ambiguous**

Pronoun in place of [MASK]?: **yes**

Annotator's answer: **Ichi**

Correct?: **yes**

26. Frank , Jump and other members of the gang go to Clay 's social club , where Frank tells Clay that he wants a percentage of all Clay 's profits . When Clay insults him , [MASK]

shoots the Mafioso .

**ambiguous**

Pronoun in place of [MASK]?: **no**

Annotator's answer: **N/A**

Correct?: **N/A**

27. The spoils were to be divided between Shivaji , Kootab Shah and Bijapur . With the agreement concluded and with [MASK] giving him money , horses and artillery , Sivajee set out in March 1677 for his invasions via Kurnool , Cuddapah and Madras .

**ambiguous**

Pronoun in place of [MASK]?: **no**

Annotator's answer: **N/A**

Correct?: **N/A**

28. Billingsley 's response was a giftbow ties for Ace . [MASK] 's reply was to ask Billingsley for some matching socks so he would be well - dressed when he was refused admittance again .

**not ambiguous**

Pronoun in place of [MASK]?: **yes**

Annotator's answer: **Ace**

Correct?: **yes**

29. In 890 , when Zhu asked Luo Hongxin the military governor of Weibo Circuit for permission to go through Luo 's territory to attack Hedong , Luo refused . [MASK] reacted by sending Ding , Ge , Pang Shigu , and Huo Cun to attack Weibo .

**not ambiguous**

Pronoun in place of [MASK]?: **yes**

Annotator's answer: **Zhu**

Correct?: **yes**

30. However , it is recorded that Lewis was born in 1381 and sent to the school at Oxford at age 10 ; it is also known that Chaucer 's " Treatise on the Astrolabe " was written for [MASK] .

**not ambiguous**

Pronoun in place of [MASK]?: **yes**

Annotator's answer: **Lewis**

Correct?: **yes**

31. Claiborne and the other survivors are rescued , thanks to quick action by Taylor and Harold . At the interment , [MASK] begs Claiborne to take him and Harold on his expedition to K2 , the second highest peak in the world .

- not ambiguous**  
Pronoun in place of [MASK]?: **yes**  
Annotator's answer: **Taylor**  
Correct?: **yes**
32. That year , LONGi signed a contract with Yingli to cooperate on monocrystalline products . In early 2016 , [MASK] signed a \$1 .  
**ambiguous**  
Pronoun in place of [MASK]?: **no**  
Annotator's answer: **N/A**  
Correct?: **N/A**
33. Katie is taken to Children 's Hospital , and Louise and Wes find themselves being arrested for " what authorities are calling the worst case of child abuse they 've ever seen " . Shortly before his trial begins , [MASK] kills himself .  
**not ambiguous**  
Pronoun in place of [MASK]?: **yes**  
Annotator's answer: **Wes**  
Correct?: **yes**
34. When it becomes clear that Warren has shifted his interest from Marjorie to Bernice , Marjorie sets about humiliating Bernice by tricking her into going through with bobbing her hair . When [MASK] comes out of the barbershop with the new hairdo , her hair is flat and strange .  
**not ambiguous**  
Pronoun in place of [MASK]?: **yes**  
Annotator's answer: **Bernice**  
Correct?: **yes**
35. Rebello defeated David Cho via Unanimous Decision at PXC 26 - Meanest Game Face on August 20 , 2011 . [MASK] made his WEC debut at WEC 39 , losing to Kenji Osawa via split decision .  
**not ambiguous**  
Pronoun in place of [MASK]?: **yes**  
Annotator's answer: **Rebello**  
Correct?: **yes**
36. Karen overhears Bernadette talking to Keanu , who [MASK] thinks may be the baby 's father .  
**not ambiguous**  
Pronoun in place of [MASK]?: **yes**  
Annotator's answer: **Karen**  
Correct?: **yes**
37. Murray Abraham , Daphne Rubin - Vega , Henry Winkler , Kathryn Boule and Judy Kuhn also got their start with Theatreworks . [MASK] has won many awards in its long history .  
**not ambiguous**  
Pronoun in place of [MASK]?: **yes**  
Annotator's answer: **Theatreworks**  
Correct?: **yes**
38. In Jacmel , three weeks prior to his reunion with Marie , Paul spends time with his lover and fiance Natasha . Natasha harbors feelings of mistrust for [MASK] , who left for New York after the earthquake , and spent three years there without having ever contacted her .  
**not ambiguous**  
Pronoun in place of [MASK]?: **yes**  
Annotator's answer: **Marie**  
Correct?: **no**
39. After the match , Deuce 'n Domino attacked Snuka and Slaughter until Tony Garea and Rick Martel came into the ring to assist Snuka and [MASK] .  
**not ambiguous**  
Pronoun in place of [MASK]?: **yes**  
Annotator's answer: **Slaughter**  
Correct?: **yes**
40. Later , Jude and Noah realize that they will be working together , as [MASK] is a new sideline reporter assigned to the Devils .  
**ambiguous**  
Pronoun in place of [MASK]?: **no**  
Annotator's answer: **N/A**  
Correct?: **N/A**
41. As such , Michael , Madeline , Sam , Fiona , and Jesse are all hell - bent on exacting revenge for Nate 's murder . Eventually , Michael , with his former mentor Tom Card helping him , tracks [MASK] 's killer , Tyler Grey , to Panama .  
**not ambiguous**  
Pronoun in place of [MASK]?: **yes**  
Annotator's answer: **Nate**  
Correct?: **yes**
42. Eileen later follows Des to Erinsborough to check up on him and she takes an instant dislike to [MASK] ' housemate , Daphne

Lawrence .

**not ambiguous**

Pronoun in place of [MASK]?: **yes**

Annotator's answer: **Des**

Correct?: **yes**

43. Although Armstrong was a third party not in privity with Leyland , and a stranger to the car purchase transaction , nonetheless Armstrong was permitted to rely on the non - derogation rights of the car owners relative to [MASK] .

**not ambiguous**

Pronoun in place of [MASK]?: **yes**

Annotator's answer: **Leyland**

Correct?: **yes**

44. Its theological center and the Fatima Masumeh Shrine are prominent features of Qom . Another very popular religious site of pilgrimage formerly outside the city of [MASK] but now more of a suburb is called Jamkaran .

**not ambiguous**

Pronoun in place of [MASK]?: **yes**

Annotator's answer: **Qom**

Correct?: **yes**

45. Schult was married to Elke Koska for 25 years , who Schult considers his muse - she was also his manager , now in cooperation with Anna Zlotovskaya , the Russian classical violinist , [MASK] married in 2010 .

**not ambiguous**

Pronoun in place of [MASK]?: **yes**

Annotator's answer: **Schult**

Correct?: **yes**

46. Gordon wakes up and successfully escapes from Nygma . Shaking off [MASK] 's pursuit , Gordon reaches Bruce and Selina 's hideout and collapses .

**not ambiguous**

Pronoun in place of [MASK]?: **yes**

Annotator's answer: **Nygma**

Correct?: **yes**

47. During World War II , Hill , as well as Lewis , filed for conscientious objector status . After the war , [MASK] , Hill and a small group of former conscientious objectors created the Pacifica Foundation in Pacifica , California .

**not ambiguous**

Pronoun in place of [MASK]?: **yes**

Annotator's answer: **Lewis**

Correct?: **yes**

48. Lana tries to intervene but is punched in the stomach by Dino . Luca lunges at Dino but [MASK] pushes him to the ground .

**not ambiguous**

Pronoun in place of [MASK]?: **yes**

Annotator's answer: **Dino**

Correct?: **yes**

49. On October 28 , 2010 , Facebook banned Rapleaf from scraping data on Facebook , and [MASK] said it would delete the Facebook IDs it had collected .

**not ambiguous**

Pronoun in place of [MASK]?: **yes**

Annotator's answer: **Rapleaf**

Correct?: **yes**

50. After arriving at the camp , Charlie apologizes to Claire , but Claire tells him to leave her and her son alone . [MASK] then goes into the jungle , and opens a hiding place where he is keeping Virgin Mary statues to put the one Eko gave him .

**not ambiguous**

Pronoun in place of [MASK]?: **yes**

Annotator's answer: **Charlie**

Correct?: **yes**

51. When Sylvie belittles Babe , she leaves Sylvie by the canal in the rain , although Sylvie is found and Shirley realises that Babe left [MASK] to die and disowns her .

**not ambiguous**

Pronoun in place of [MASK]?: **yes**

Annotator's answer: **Sylvie**

Correct?: **yes**

52. Gregory , as an infant , drowned in a bathtub when Kay became distracted from a call from Sam . [MASK] and Kay ended up divorcing .

**not ambiguous**

Pronoun in place of [MASK]?: **yes**

Annotator's answer: **Sam**

Correct?: **yes**

53. Stefanie in Rio is a 1960 West German romantic comedy film directed by Curtis Bernhardt and starring Carlos Thompson , Sabine Sinjen and Andra Parisy . It is a sequel to the 1958 film " [MASK] " .

**ambiguous**

Pronoun in place of [MASK]?: **no**

Annotator's answer: **N/A**

Correct?: **N/A**

54. Kent Ling and his team of assassins are then forced to rescue Ling Hung , but it involved them and Ling Hung having to be in a very deadly gun battle against Kam Tin 's henchmen and unfortunately [MASK] 's team are all killed in the process .

**not ambiguous**

Pronoun in place of [MASK]?: **yes**

Annotator's answer: **Kent Ling**

Correct?: **yes**

55. On the weekend of January 14 , 2017 , Walker was planning to compete at the 2016 Montana ProRodeo Circuit Finals in Great Falls . [MASK] was in 2nd place in the circuit standings with \$14 , 351 so far .

**not ambiguous**

Pronoun in place of [MASK]?: **yes**

Annotator's answer: **Walker**

Correct?: **yes**

56. Samantha , Jennifer , Billy , Taylor and Coop leave by the end of the season . In the season finale , [MASK] gives birth to Michael 's son and agrees to share motherhood with the returning Jane .

**ambiguous**

Pronoun in place of [MASK]?: **no**

Annotator's answer: **N/A**

Correct?: **N/A**

57. Appears in " " Bucky was a worker who encountered Michael Myers as he wandered around an electrical power plant . [MASK] told Michael that he was not permitted on the grounds .

**not ambiguous**

Pronoun in place of [MASK]?: **yes**

Annotator's answer: **Bucky**

Correct?: **yes**

58. In August of the same year , Laura came to Coronation Street to tell Alan and Elsie Tanner that she was getting re - married and wanted to drop [MASK] 's loan - although Elsie refused .

**not ambiguous**

Pronoun in place of [MASK]?: **yes**

Annotator's answer: **Elsie**

Correct?: **no**

59. When Spike lands , Jerry sticks out his tongue and throws Spike 's lips over his own face , provoking [MASK] to chase him around the corner .

**not ambiguous**

Pronoun in place of [MASK]?: **yes**

Annotator's answer: **Spike**

Correct?: **yes**

60. A year later she met Friedrich Schiller and played Luise Miller in his first performance of Kabale und Liebe . Sophie Albrecht and [MASK] had similar interests and became close friends .

**not ambiguous**

Pronoun in place of [MASK]?: **yes**

Annotator's answer: **Friedrich Schiller**

Correct?: **yes**

61. Walcott lost the count as Ali circled around a floored Liston and [MASK] tried to get him back to a neutral corner .

**not ambiguous**

Pronoun in place of [MASK]?: **yes**

Annotator's answer: **Walcott**

Correct?: **yes**

62. At the World Matchplay , Whitlock recorded wins over Kevin Painter , Raymond van Barneveld and James Wade to reach the semi - finals of the event for the second time , with [MASK] stating he was playing his best darts in five years .

**ambiguous**

Pronoun in place of [MASK]?: **no**

Annotator's answer: **N/A**

Correct?: **N/A**

63. In the long period that Lars Semb was manager at Moss Jernverk he traveled almost yearly to the mining areas and he subsequently stayed with the local agents . [MASK] was totally dependent on charcoal that the surrounding farmers produced .

**not ambiguous**

Pronoun in place of [MASK]?: **yes**

Annotator's answer: **Moss Jernverk**

Correct?: **yes**

64. Armstrong felt impressed with the style of Hansen 's work . In June 2002 , Armstrong

and [MASK] signed a formal agreement .

**not ambiguous**

Pronoun in place of [MASK]?: **yes**

Annotator's answer: **Hansen**

Correct?: **yes**

65. In 1235 and 1239 the da Camino managed to obtain the rule in Treviso , but the second time they were betrayed by Alberico da Romano , who expelled the Guelphs from the city . However , with Gherardo III da Camino the [MASK] regained prominence .

**not ambiguous**

Pronoun in place of [MASK]?: **yes**

Annotator's answer: **Guelphs**

Correct?: **yes**

66. The small forward Shamell Stallworth made a three - pointer with the clock reset already and gave the victory to Pinheiros . This game was extremely important because [MASK] because Pinheiros finished the regular season in front of Flamengo precisely by direct confrontation .

**not ambiguous**

Pronoun in place of [MASK]?: **no**

Annotator's answer: **Pinheiros**

Correct?: **yes**

67. In the next round , Williams faced Alona Bondarenko and once again won with only dropping 5 games . In the quarterfinals , for the third match in a row , [MASK] only dropped five games this time to Czech Lucie afov .

**not ambiguous**

Pronoun in place of [MASK]?: **yes**

Annotator's answer: **Williams**

Correct?: **yes**

68. Most traffic is along the stretch between Falkner and Ripley . The Mississippi Department of Transportation calculated an average of 14 , 000 vehicles passing along the route near [MASK] .

**ambiguous**

Pronoun in place of [MASK]?: **no**

Annotator's answer: **N/A**

Correct?: **N/A**

69. Asmodeus kills Vicki and then attacks Dave and Susan . Dave and [MASK] flee to a cemetery and destroy the demon with a cross

.

**not ambiguous**

Pronoun in place of [MASK]?: **no**

Annotator's answer: **Susan**

Correct?: **yes**

70. In France , Andrianarivo met with former President Albert Zafy on June 11 , 2007 ; Zafy had also met with Ratsiraka and former Deputy Prime Minister Pierrot Rajaonarivelo in the previous days . [MASK] and Ratsiraka met with Zafy again on June 25 .

**not ambiguous**

Pronoun in place of [MASK]?: **no**

Annotator's answer: **Andrianarivo**

Correct?: **yes**

71. His testimony addressed the key " lie " : that Clinton was allegedly pressuring Betty Currie and Blumenthal himself to attest that it was Lewinsky who initially pursued [MASK] , not vice versa .

**not ambiguous**

Pronoun in place of [MASK]?: **yes**

Annotator's answer: **Clinton**

Correct?: **yes**

72. Leornado sent Garrett , Vasili Dassiev , Shoji Soma , and Daniel Whitehall to Giza to acquire a power source from a Brood vessel after destroying the Brood inside . [MASK] approved the idea of using the power source to run the rejuvenations chambers found by another team .

**ambiguous**

Pronoun in place of [MASK]?: **no**

Annotator's answer: **N/A**

Correct?: **N/A**

73. Eventually , Saori and Yoshino rejoin Shuichi 's group of friends , though Saori says she still hates Yoshino and Momoko . Shuichi and Anna start dating , much to the surprise of their friends and [MASK] 's sister .

**ambiguous**

Pronoun in place of [MASK]?: **no**

Annotator's answer: **N/A**

Correct?: **N/A**

74. Gmina Branice contains the villages and settlements of Bliszczycze , Boboluszkki , Branice , Dzbase , [MASK] - Osiedle , Dzierkowice , Grdczany , Jabonka , Jakubowice , Jdrychowice , Lewice , Michakowice , Niekazanice ,

Posucice , Turkw , Uciechowice , Wodzienin , Wdka and Wysoka .

**not ambiguous**

Pronoun in place of [MASK] ? : **no**

Annotator's answer: **Dzbace**

Correct?: **yes**

75. When she sees Franky getting into Luke 's car , she gets into a van with Matty . Grace joins him , wanting to talk , but Liv rushes up and demands they follow Franky and [MASK] .

**not ambiguous**

Pronoun in place of [MASK] ? : **no**

Annotator's answer: **Luke**

Correct?: **yes**

76. She explained that Laura was frantic and told her that Luis jumped in the water channel and that she was unable to see him anymore . Supposedly , the group of friends met [MASK] at the park and started looking for Luis .

**not ambiguous**

Pronoun in place of [MASK] ? : **yes**

Annotator's answer: **Laura**

Correct?: **yes**

77. Whether it was Sidney who next challenged Vere to a duel or the other way around , Vere did not take it further , and the Queen personally took Sidney to task for not recognizing the difference between his status and [MASK] 's .

**not ambiguous**

Pronoun in place of [MASK] ? : **no**

Annotator's answer: **Vere**

Correct?: **yes**

78. Wei attempts to rescue Ku , only to find out that Po deduced Wei 's identity as a cop , since [MASK] was too skilled compared to the rest of his gang .

**not ambiguous**

Pronoun in place of [MASK] ? : **yes**

Annotator's answer: **Po**

Correct?: **no**

79. After an unsuccessful evening on the town , Clark takes Sarah to the Indian side of Calcutta , where they attend a party at the home of a wealthy socialite . There , [MASK] seduces Sarah by challenging her to taste life .

**not ambiguous**

Pronoun in place of [MASK] ? : **yes**

Annotator's answer: **Clark**

Correct?: **yes**

80. The incapacitated Mike is stabbed repeatedly by Erin , who ties a rope around his neck , attaches the other end to a tractor , and drives the vehicle until Mike 's neck snaps . [MASK] stumbles outside , and discovers Danny , who is barely alive .

**not ambiguous**

Pronoun in place of [MASK] ? : **yes**

Annotator's answer: **Erin**

Correct?: **yes**

81. Slingsby was married to the sister of Lawford 's wife , hence why Lawford had to give Slingsby a chance to command the Light Company to prove himself which angered Sharpe . [MASK] was regarded as a poor officer who was often drunk .

**ambiguous**

Pronoun in place of [MASK] ? : **no**

Annotator's answer: **N/A**

Correct?: **N/A**

82. Hans and Gerda 's mutual attraction is a challenge , as Gerda is navigating her changing relationship to Lili ; but Hans ' long - time friendship with and affection for [MASK] cause him to be supportive of both Lili and Gerda .

**ambiguous**

Pronoun in place of [MASK] ? : **no**

Annotator's answer: **N/A**

Correct?: **N/A**

83. Sirius " sailed in ballast , having unloaded a cargo of hay at Rsneshavn after departing Troms . She had left [MASK] in the morning of 17 May 1940 . "

**not ambiguous**

Pronoun in place of [MASK] ? : **no**

Annotator's answer: **Rsneshavn**

Correct?: **yes**

84. Harold does not take the news well , but Karl eventually convinces him to fight . [MASK] has an operation and begins chemotherapy after speaking to Stephanie Scully .

**not ambiguous**

Pronoun in place of [MASK] ? : **yes**

Annotator's answer: **Harold**

Correct?: **yes**



85. Ron knocks Dale out and leaves her in a locked car filling with exhaust , sadistically goading Andrew into braving his agoraphobia in order to save her . Andrew manages to save her and wound Ron ; reviving , Dale deals [MASK] a death blow .

**not ambiguous**

Pronoun in place of [MASK]?: **no**

Annotator's answer: **Ron**

Correct?: **yes**

86. Evans introduced two romantic interests for Corrigan : Anina Kreemar , the wealthy niece of Corrigan 's bureau chief , and [MASK] 's friendly rival Jennever Brand , a spirited female agent of a rival clandestine spy agency .

**not ambiguous**

Pronoun in place of [MASK]?: **yes**

Annotator's answer: **Corrigan**

Correct?: **yes**

87. Her fifth victim was Pillama , aged 60 , and killed at Maddur Vyadyanathapura . [MASK] was a temple priest at Hebbal temple .

**not ambiguous**

Pronoun in place of [MASK]?: **yes**

Annotator's answer: **Pillama**

Correct?: **yes**

88. Sandy tells Rizzo she plans to watch the race and offers to help [MASK] despite the rumors about Rizzo 's character that have been spread around school .

**not ambiguous**

Pronoun in place of [MASK]?: **yes**

Annotator's answer: **Rizzo**

Correct?: **yes**

89. Qianru 's mother , Fengyi tries to talk her into accepting the fact that Huanhuan is autistic but Qianru is unwilling to face reality . After some time , under Wenxin 's patient persuasion , [MASK] finally agrees to send Huanhuan to a school for children with special needs .

**not ambiguous**

Pronoun in place of [MASK]?: **yes**

Annotator's answer: **Qianru**

Correct?: **yes**

90. After Trey pushes away Guy , Trey finally realized that Alex was right all along and that

Guy has been trying to break them up . Trey and Alex kick [MASK] out of their home and later apologizes to Alex .

**not ambiguous**

Pronoun in place of [MASK]?: **yes**

Annotator's answer: **Guy**

Correct?: **yes**

91. Burns 's clashes with Smith was perhaps most obvious at the notorious New York City concert in 1998 where Burns attacked [MASK] after the vocalist repeatedly and deliberately knocked one of Burns 's cymbal stands to the floor .

**not ambiguous**

Pronoun in place of [MASK]?: **yes**

Annotator's answer: **Smith**

Correct?: **yes**

92. When Viki asks if he loves Echo , Charlie hesitates , and Viki storms off . On April 12 , Viki asks [MASK] again whether or not he loves Echo ; he says he does .

**not ambiguous**

Pronoun in place of [MASK]?: **yes**

Annotator's answer: **Charlie**

Correct?: **yes**

93. In pre - sentence proceedings , Chen 's father , Edward Chen , was reported as saying : During his final plea on 2 February 2006 , Chen said : On 15 February 2006 [MASK] was sentenced to life imprisonment .

**not ambiguous**

Pronoun in place of [MASK]?: **yes**

Annotator's answer: **Chen**

Correct?: **yes**

94. Andrea considers assassinating the Governor , but Milton knows that his second - in - command , Martinez , will follow through on the Governor 's plans . Instead , [MASK] urges Andrea to escape and warn Rick and the others .

**not ambiguous**

Pronoun in place of [MASK]?: **yes**

Annotator's answer: **Milton**

Correct?: **yes**

95. Patterson took the communiqu to the White House , where Truman and Attlee signed it on 16 November 1945 . The next meeting of the Combined Policy Committee on 15

April 1946 produced no accord on collaboration , and resulted in an exchange of cables between Truman and [MASK] .

**ambiguous**

Pronoun in place of [MASK] ? : **no**

Annotator's answer: **N/A**

Correct?: **N/A**

FA Cup seven times , and [MASK] strongly backed him and his transfer wishes throughout .

**not ambiguous**

Pronoun in place of [MASK] ? : **no**

Annotator's answer: **Dein**

Correct?: **yes**

96. In any case , Baldwin 's other brother Philip of Namur remained as regent , and eventually both of [MASK] 's daughters , Joan and Margaret II , were to rule as countesses of Flanders .

**not ambiguous**

Pronoun in place of [MASK] ? : **no**

Annotator's answer: **Baldwin**

Correct?: **yes**

97. In the late 1990s , Luis Rossi , Ivan Fernandez , and Mercedes Fernandez purchased the Aragon . In September 2014 , [MASK] sold all her interests in the Aragon .

**not ambiguous**

Pronoun in place of [MASK] ? : **no**

Annotator's answer: **Mercedes Fernandez**

Correct?: **yes**

98. Peschko also played chamber music ; best known are his projects with violinist Georg Kulenkampff and cellists Enrico Mainardi and Hans Adomeit . From 1953 to 1958 [MASK] was responsible for lieder , choir and church music at Radio Bremen .

**not ambiguous**

Pronoun in place of [MASK] ? : **yes**

Annotator's answer: **Peschko**

Correct?: **yes**

99. Realising the war was lost , Himmler attempted to open peace talks with the western Allies without Hitler 's knowledge , shortly before the end of the war . Hearing of this , [MASK] dismissed him from all his posts in April 1945 and ordered his arrest .

**not ambiguous**

Pronoun in place of [MASK] ? : **yes**

Annotator's answer: **Hitler**

Correct?: **yes**

100. Dein was behind the appointment of the then little known Arsne Wenger to the manager 's job in 1996 ; under Wenger , Arsenal have won the Premier League three times and the
